# Supplementary material for: Synthesis of nickel chalcogenide hollow spheres using an l-cysteine-assisted hydrothermal process for efficient supercapacitor electrodes
Source: Royal Society of Chemistry journal article supplement (doi:10.1039/c6ta10426f), 2017-01-01
Supplement: c6ta10426f1.pdf [file c6ta10426f1.pdf]

## Supporting Information

### Synthesis of Nickel Chalcogenide Hollow Spheres Using L-Cysteine-assisted Hydrothermal for efficient supercapacitor electrode

Min-Lu<sup>a</sup>, Xue-Ping Yuan<sup>a</sup>, Xiao-Hui Guan<sup>a</sup>, Guang-Sheng Wang<sup>b\*</sup>

<sup>a</sup>*School of Chemical Engineering, Northeast Electric Power University, Jilin 132000,*

*PR China*

<sup>b</sup>*Key Laboratory of Bio-Inspired Smart Interfacial Science and Technology of*

*Ministry of Education, School of Chemistry and Environment, Beihang*

*University, Beijing 100191, PR China*

*\*Email - wanggsh@buaa.edu.cn*

#### Supplementary Equations

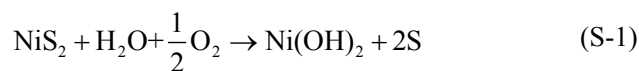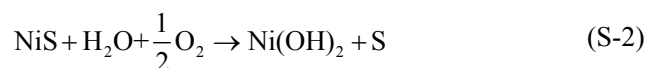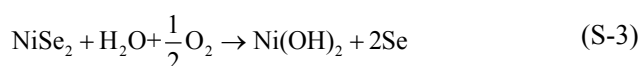

The reversible redox reactions were as follows:

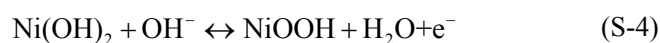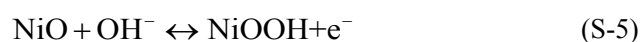

## Supplementary Figures

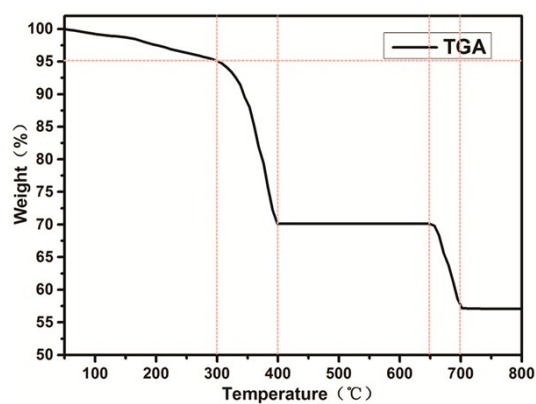

**Fig. S1** TG cure of NiS<sub>2</sub> in air from 50 °C to 800 °C with a heating rate of 10 °C min<sup>-1</sup>.

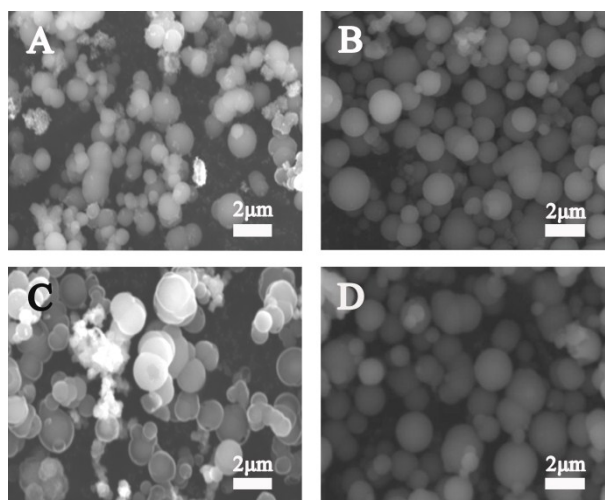

**Fig. S2** SEM images of the product during prepare NiS<sub>2</sub> at different time: (A)8h; (B)12h; (C)16h; (D)20h.

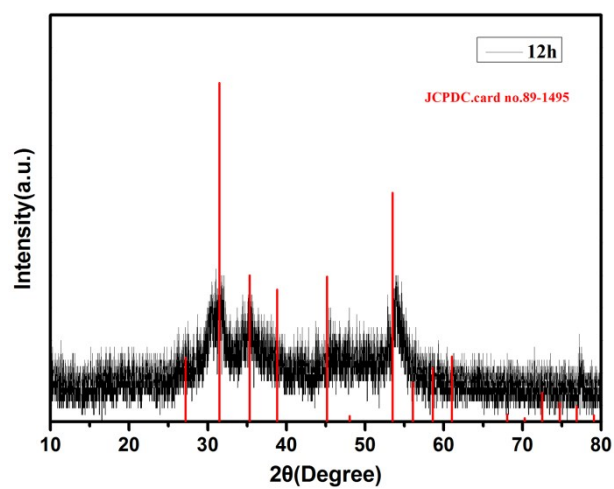

**Fig. S3** XRD pattern of the product NiS<sub>2</sub> (12h).

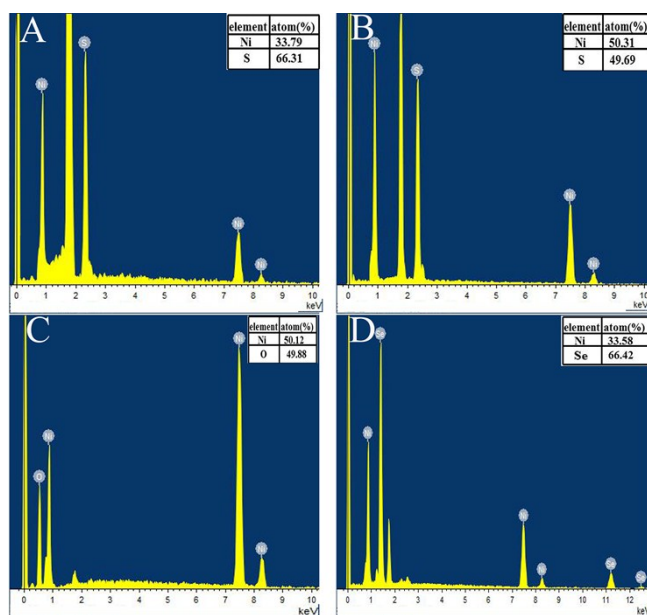

**Fig. S4** EDS spectra of the products: (A) NiS<sub>2</sub>; (B) NiS; (C) NiO; (D) NiSe<sub>2</sub>.

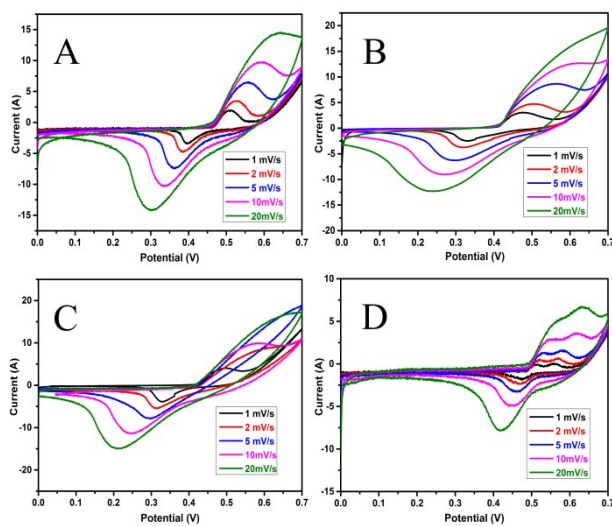

**Fig. S5** CV curves of the electrodes at different scan rates: (A) NiS<sub>2</sub>; (B) NiS; (C) NiO; (D) NiSe<sub>2</sub>.

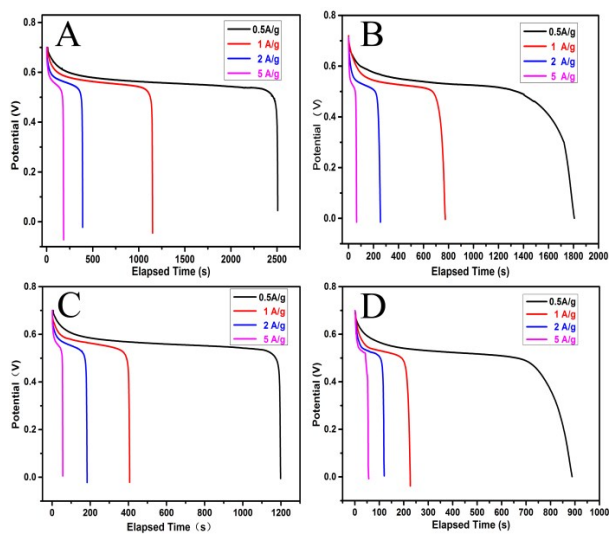

**Fig. S6** discharge curves of the electrodes at various current densities: (A) NiS<sub>2</sub>; (B) NiS; (C) NiO; (D) NiSe<sub>2</sub>.

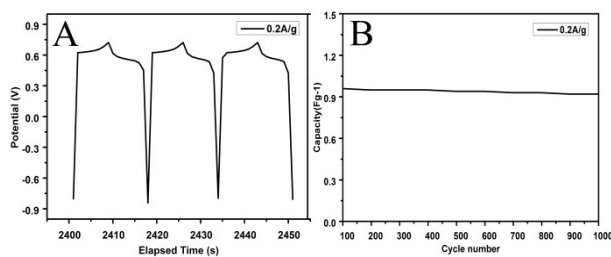

**Fig. S7** (A) Charge-discharge curves of the bare Ni foam electrode; (B) specific capacitances of the bare Ni foam electrode at different cycles.

**Table 1** Calculated electrochemical parameters for various working electrodes based on the proposed circuit.

| Working electrode | $R_e$ ( $\Omega \cdot \text{cm}^2$ ) | $R_{ct}$ ( $\Omega \cdot \text{cm}^2$ ) | $Z_w$ ( $\Omega \cdot \text{cm}^2$ ) | CPE (F) |
|-------------------|--------------------------------------|-----------------------------------------|--------------------------------------|---------|
| NiS <sub>2</sub>  | 1.107                                | 0.573                                   | 5.042                                | 9.964   |
| NiS               | 0.912                                | 0.628                                   | 7.681                                | 10.702  |
| NiO               | 0.725                                | 1.033                                   | 3.302                                | 14.790  |
| NiSe <sub>2</sub> | 0.639                                | 1.257                                   | 8.045                                | 9.492   |
